# Supplementary material
Source: PubMed Central journal article supplement (PMC5878946)

1  
2  
3 **Title page**  
4

5  
6 **Title:** Landscape of Antimicrobial Stewardship Programs in Ontario, Canada  
7  
8

9  
10  
11 **Authors:**  
12

13  
14 Corresponding author  
15

16  
17 Valerie Leung<sup>1</sup>, BScPhm, MBA  
18

19 Public Health Ontario  
20

21 480 University Avenue, Suite 300. Toronto, ON M5G 1V2  
22

23  
24 t: 647.260.7241 e: [Valerie.Leung@oahpp.ca](mailto:Valerie.Leung@oahpp.ca)  
25  
26

27  
28 Coauthors  
29

30 Julie Hui-Chih Wu<sup>1</sup>, MSc  
31

32 Bradley J Langford<sup>1</sup>, BScPhm, PharmD  
33

34 Gary Garber<sup>1,2</sup>, MD  
35  
36  
37

38  
39 **Affiliations**  
40

- 41  
42 1. Public Health Ontario, Toronto, Ontario Canada  
43  
44 2. Department of Medicine, University of Toronto, Toronto, Ontario Canada  
45  
46

47 No financial support for the work to be declared  
48

49  
50 No conflict of interest to declare  
51  
52  
53  
54  
55  
56  
57  
58  
59  
60

## Landscape of Antimicrobial Stewardship Programs in Ontario, Canada

### Background:

Antimicrobial resistance is an important public health issue globally and in Canada. To understand the current state of antimicrobial stewardship in Ontario healthcare facilities, the Antimicrobial Stewardship Program (ASP) at Public Health Ontario (PHO) conducted a voluntary survey of hospitals in the province.

### Methods:

The Ontario ASP Landscape survey was distributed online to hospitals targeting front-line ASP clinicians and was open for five weeks in fall 2016. Email and telephone reminders were used to encourage responses. Descriptive analysis was performed at an aggregate level and by hospital type. Mental Health and ambulatory sites were excluded.

### Results:

The response rate was 74% (97/131 organizations). Of these, 93% have a formal ASP or are in the process of implementation. Just over half (56%) identified appropriate antibiotic use as part of the organization's quality improvement plan or as a strategic goal/priority. Half (50%) of ASPs do not have designated resources; those that do are under resourced with respect to physician and pharmacist staffing. The scope of ASP strategy implementation is variable however implementation of Infectious Disease Society of America (IDSA) recommended interventions such as prospective audit and feedback appears to have increased since 2013. Fifty-one percent of ASPs track defined daily dose (DDD), 56% track expenditures and 39% track days of therapy (DOT).

### Conclusions:

Most Ontario hospitals have a formal ASP but there are opportunities for improvement. Future efforts should increase the priority of and improve resource allocation for ASPs so that programs can continue to grow in scope and impact.

**Keywords:** antimicrobial stewardship; antibiotic stewardship; antimicrobial stewardship programs; implementation; hospitals; Canada

## Introduction

Antimicrobial resistance (AMR) is an important public health issue and has been highlighted as a serious global threat to human health.<sup>1,2</sup> AMR has also been identified as an area of significant concern for the Government of Canada, the Ministry of Health and Long-Term Care of Ontario (MOHLTC) and Public Health Ontario (PHO).<sup>3</sup>

Antimicrobial Stewardship can be defined as coordinated interventions designed to improve and measure the appropriate use of antimicrobial agents by promoting the selection of the optimal antimicrobial drug regimen including dosing, duration of therapy, and route of administration.<sup>4</sup> The main goals of an antimicrobial stewardship program (ASP) are to optimize clinical outcomes related to antimicrobial use while minimizing toxicity and other adverse events. ASPs also aim to reduce AMR in individual patients and in the population by limiting selective pressure on microbial populations through improved prescribing.

Since 2013, antimicrobial stewardship has been an Accreditation Canada Required Organizational Practice (ROP) for facilities providing inpatient acute care, inpatient cancer, inpatient rehabilitation and complex continuing care services (CCC).<sup>5</sup> To help build, grow and enhance local ASPs, PHO compiled a comprehensive list of 32 antimicrobial stewardship tools, interventions and activities (“strategies”). These strategies are organized into five categories: prescribing guidance, clinical, microbiology-related, structural/process and formulary-related strategies and publically available online (<http://www.publichealthontario.ca/asp>).

While previous provincial surveys have found that the proportion of Ontario hospitals with ASPs increased over time, from being “rare” in 2007 to about 32% in 2011, there still exists significant opportunity for improvement in both the scope and maturity of hospital ASPs.<sup>6-8</sup> To gain an understanding of the current landscape of hospital ASPs, how they have evolved since 2013 and barriers to further advancing ASPs, PHO conducted a voluntary survey of hospitals in fall 2016.

## Methods

The Ontario ASP Landscape survey, developed by the PHO ASP based on previous surveys of hospital ASPs and with input from stakeholders, asked organizations about structural (program components and infrastructure) and strategic (program activities) elements of their ASP. The survey was piloted with a small number of individuals involved in hospital ASPs (e.g., pharmacists, program leads) and refined based on their feedback prior to dissemination. The survey was approved by ethics and privacy at PHO.

The survey was open for five weeks (September 19<sup>th</sup> – October 24<sup>th</sup>, 2016) and was administered online using FluidSurveys ([www.fluidsurveys.com](http://www.fluidsurveys.com)). Respondents also had an option to complete the questions on paper and fax their completed survey.

This survey was distributed to all hospitals with the instructions that it should be completed by the individual responsible for antimicrobial stewardship in their organization and that there should be only one response per organization unless there are multiple sites and submission of site-specific responses

1  
2  
3 was desired. Any sites that identified as primarily providing mental health or ambulatory services were  
4 excluded from the analysis as ASPs are not a ROP for this type of organization.  
5  
6

7 To target those responsible for antimicrobial stewardship, a distribution list was created based on a  
8 hospital organization list from the MOHLTC Health Analytics branch, PHO contacts known to be involved  
9 with antimicrobial stewardship with their organization, the Antimicrobial Stewardship Hospital  
10 Pharmacists of Ontario Network distribution list (an independent email distribution list of stewardship  
11 and ID pharmacist in Ontario hospitals) and with assistance from PHO Infection Prevention and Control  
12 regional teams. An invitation to participate was distributed via email. Targeted email and telephone  
13 reminders were used to encourage response rates. There were no monetary incentives offered for  
14 participation.  
15  
16

17  
18 The survey had 29 questions and adaptive questioning was used to simplify the survey; only  
19 respondents who reported having a formal ASP were presented questions about program structure but  
20 all respondents were presented questions about ASP strategies since many of these activities can be  
21 implemented in the absence of a formal ASP. All respondents were asked whether or not each strategy  
22 had been implemented at their organization and, if so, the year of implementation. A definition of each  
23 strategy was included in the survey and respondents were directed to the PHO website for further  
24 details. The survey also included questions about challenges to implementing or advancing local  
25 stewardship programs. Efforts were made to eliminate unintended duplicate responses for  
26 organizations/sites by contacting the organization to determine which response should be used.  
27 Incomplete responses were included after following-up with the hospital and clarifying. Hospital type  
28 was classified as per Ontario Hospital Association (OHA) definitions.<sup>9</sup> If an organization/corporation had  
29 multiple sites, classification was by largest hospital type.  
30  
31  
32  
33  
34

35 Descriptive statistics were calculated using Microsoft Excel 2010 (Version 14.0.6024.1000). The  
36 methodology of this survey has been reported according to criteria specific to online surveys.<sup>10</sup>  
37  
38

## 39 **Results**

### 40 **Hospital Characteristics**

41  
42 Ninety-seven of 131 eligible hospital organizations responded resulting in a 74% overall response rate.  
43 The responses were primarily completed by physicians or pharmacists directly involved in antimicrobial  
44 stewardship activities. Small community hospitals had the lowest response rate (61%) while acute  
45 teaching hospitals had the highest response rate (91%). Of those that responded, 88% (85/97) reported  
46 having a formal ASP, 5% (5/97) were in the process of implementation and 7% (7/97) did not have a  
47 formal ASP. Just over half of formal ASPs were established in 2013 or earlier; the vast majority of these  
48 were in acute teaching and large community hospitals.  
49  
50  
51  
52

### 53 **ASP Structural Elements in Ontario**

54  
55 Almost all hospital organizations with a formal ASP (85) or in the process of implementing one (5) have a  
56 multidisciplinary Antimicrobial Stewardship Committee (82%, 74/90), physician (87%, 78/90) and  
57  
58  
59  
60

1  
2  
3 pharmacist champions (97%, 87/90). Of these hospital ASPs, 70% (63/90) have guidance documents  
4 that help direct program development. Over half (56%, 46/90) include appropriate antibiotic use as part  
5 of their organization's quality improvement plan or as an organizational strategic goal or priority.  
6 Twenty-one percent of respondents identified lack of prioritization of appropriate antibiotic use as a  
7 barrier to moving their ASP forwards.  
8  
9

10  
11 Half of organizations with a formal ASP or in the process of implementing one (50%, 45/90) reported not  
12 having any designated funding/resources for their program. More acute teaching hospitals reported  
13 having designated resources as compared with the other hospital types. Only three small community  
14 and two CCC and Rehabilitation hospitals reported having designated resources; two of these had  
15 resources specifically allocated for an ASP physician and/or pharmacist. Few organizations (11%, 5/45)  
16 reported having dedicated resources for Information Technology professionals or other  
17 administrative/program support. A number of respondents submitted comments identifying resource  
18 constraints as a significant barrier to advancing their ASP. Table 3 describes physician and pharmacist  
19 resource allocation in further detail for acute teaching and large community hospitals.  
20  
21  
22

### 23 **Implementation of Antimicrobial Stewardship Strategies**

24  
25 Table 4 shows the frequency of antimicrobial stewardship strategies that have been implemented in  
26 Ontario hospitals as of 2016. The most frequently implemented strategies are therapeutic drug  
27 monitoring (86%), antibiograms (81%) and automatic stop orders (80%). Figure 1 shows the  
28 implementation of selected stewardship strategies in 2013 compared with 2016. These selected  
29 strategies reflect PHO ASP strategies most closely aligned with the Infectious Diseases Society of  
30 America (IDSA) recommendations for implementation of an antibiotic stewardship program. These  
31 strategies were designated as strong recommendations with moderate quality evidence for the general  
32 adult in-patient population.<sup>12</sup>  
33  
34  
35  
36

### 37 **Measuring ASP Impact**

38  
39 With respect to antimicrobial utilization, 56% of ASPs in Ontario hospitals measure expenditures, 51%  
40 track defined daily doses (DDD) and 39% track days of therapy (DOT). ASP interventions and acceptance  
41 rates are tracked by 57% and 44% of hospitals respectively. Many hospitals also include tracking of  
42 antimicrobial resistance (77%) and rates of *C.difficile* infection (74%) as part of their antimicrobial  
43 stewardship activities. One third (33%) of respondents identified lack of ability to report ASP metrics and  
44 nearly two-thirds (64%) cited work effort required to report ASP metrics as ongoing challenges to  
45 advancing their local ASP.  
46  
47  
48

### 49 **DISCUSSION**

50  
51 Antimicrobial resistance has been recently highlighted to be a serious risk to human health globally. As a  
52 result, there has been increased interest in antimicrobial stewardship as a mitigating strategy for  
53 reducing the overall burden of AMR. In Canada, because hospitals electing to undergo accreditation with  
54 Accreditation Canada are required to demonstrate that an ASP is in place to optimize antimicrobial use,  
55 it is not surprising to see that implementation of ASPs has increased from very few hospitals having a  
56  
57  
58  
59  
60

1  
2  
3 formal program in 2007 to almost all either having implemented or in the process of implementing  
4 formal ASPs by 2016.<sup>6</sup> Of these, just over half (56%) of programs were established in 2013 or earlier,  
5 with the majority of these more mature programs being in acute teaching and large community  
6 hospitals.  
7  
8

9  
10 The detailed nature of this survey provides significant insight into the current state of ASP structure in  
11 Ontario hospitals as well as areas for growth. Elevating the priority and visibility of ASPs and optimizing  
12 resource allocation for hospital ASPs are two such opportunities: 56% (46/88) reported that appropriate  
13 antibiotic use is a strategic goal, priority or part of the organization's quality improvement plan, 44%  
14 (40/90) had specific resources allocated for ASP physician(s) and/or pharmacist(s) FTEs. This is similar to  
15 results of a recent national survey of over 4000 US Acute Care hospitals by the Centers for Disease  
16 Control and Prevention (CDC)<sup>13</sup>, which found that in terms for hospital leadership commitment for  
17 antibiotic stewardship, 52.6% had a written statement of support and 31.7% had salary support. These  
18 results highlight the importance of leadership commitment in building robust programs: both written  
19 statement of support and salary support independently predicted implementation of all seven CDC Core  
20 Elements of Hospital ASPs, which are the recommended components for successful stewardship  
21 programs. Unique to our survey are additional insights on the level of resource allocation for ASP  
22 physicians(s) and pharmacist(s). In 2016, the Association of Medical Microbiology and Infectious Disease  
23 (AMMI) Canada released business case recommendations for Inpatient Antimicrobial Stewardship  
24 Programs in Acute Care, Cancer Care, Rehabilitation and Complex Continuing Care.<sup>14</sup> For larger  
25 institutions (acute teaching, large community), the recommendation is 1.0 physician and 3.0  
26 pharmacists for every 1000 beds. For smaller institutions and CCC and rehabilitation hospitals, the  
27 recommendation is that there be a minimum of 0.1 physicians and 0.3 pharmacists allocated. In  
28 contrast, this survey found that acute teaching hospitals with designated resources (12/15) reported an  
29 average of 0.57/1000 physician FTEs per 1000 beds and 2.16 pharmacist FTEs per 1000 beds ; large  
30 community hospitals with designated resource (28/45) reported an average of 0.65 physician FTEs per  
31 1000 beds and 2.55 pharmacist FTEs per 1000 beds. Only 3 of 28 small community hospitals and 2 of 11  
32 CCC and Rehabilitation hospitals reported having any designated resources. In addition, AMMI Canada  
33 also recommends designated resources for administrative/program support and data analysis which  
34 very few organizations reported in this survey. Accordingly, there is significant opportunity for  
35 improvement in resource allocation for hospital ASPs in Ontario.  
36  
37  
38  
39  
40  
41  
42  
43  
44

45 All respondents reported implementing one or more stewardship strategies whether or not they have a  
46 formal ASP in place, however, the overall scope of implementation is variable. In 2016, the IDSA  
47 released evidenced-based guidelines to implementing an antibiotic stewardship program which is a  
48 helpful framework for highlighting a subset of the 32 PHO strategies. For the general adult in-patient  
49 population, there are a number of strong recommendations with moderate-quality evidence that have  
50 related PHO ASP strategies (Figure 1). It is encouraging to see that implementation of impactful  
51 strategies such as prospective audit and feedback has increased over time and is now in place in the  
52 majority of responding organizations.<sup>12</sup> Interestingly, the proportion of responding organizations that  
53 have implemented prospective audit and feedback (65%) in this survey is very similar to that reported in  
54 the CDC survey (63%).<sup>13</sup>  
55  
56  
57  
58  
59  
60

1  
2  
3 Also consistent with the CDC survey is that measurement of program impact is an area for further  
4 development. Tracking and reporting antibiotic utilization is considered a core component of hospital  
5 ASPs yet a substantial proportion of respondents to our survey reported either lack of ability to report  
6 ASP metrics or the work effort required to report ASP metrics as barriers to advancing ASP. The  
7 proportion collecting defined daily dose (51%), antimicrobial expenditures (56%) and days of therapy  
8 (39%) was very similar to the CDC survey which reported 60% using either purchase data or defined  
9 daily dose and 37% measuring days of therapy.  
10  
11  
12

13 Whereas it is clear that individual hospital ASPs in Ontario need more infrastructure and support for  
14 measurement of local program impact, this is also true at the provincial level. To effectively plan,  
15 evaluate and strengthen antimicrobial stewardship programs on a systems level, the ability to compare  
16 and benchmark antibiotic utilization is critical.<sup>15,16</sup> Although a coordinated system for synthesizing and  
17 benchmarking hospital antimicrobial use data in Ontario is not yet in place, the current heterogeneity in  
18 antimicrobial utilization measurement and requirement for risk-adjustment will need to be addressed in  
19 the future to support a meaningful region-wide antibiotic use surveillance program. For these reasons,  
20 policy actions to encourage strengthening of individual hospital program measurement as well as efforts  
21 to standardize and improve data quality are needed.  
22  
23  
24  
25

26 While a key strength of this voluntary survey is the overall response rate of 74%, within range of  
27 previously reported acceptable response rates (50-75%),<sup>17</sup> there are several limitations that should be  
28 noted. First, responses were self-reported and not externally validated. Small community hospitals were  
29 under represented introducing potential bias towards organizations with formal and potentially more  
30 well-established ASPs in the overall results. Another important limitation is that while organizations had  
31 the option to submit site-specific responses, most were at the organizational level, therefore any  
32 differences in how strategies are implemented at different sites within organizations were not captured.  
33 Finally, since PHO's 32 antimicrobial stewardship strategies are not mutually exclusive, some overlap  
34 and differences in interpretation should be expected despite descriptions being provided within the  
35 survey. One example would be degree of implementation for a strategy such as allergy verification;  
36 while many organizations may already have an established process for clarification and documentation  
37 of allergy status some may not have indicated that they systematically implemented this strategy if they  
38 were contemplating more advanced techniques such as penicillin skin testing. Furthermore, this survey  
39 does not provide insight into the extent or fidelity of implementation of any given strategy. For example,  
40 prospective audit and feedback can be operationalized in a variety of ways from rotating between  
41 services to performing this intervention for all in-patients and details such as this was not captured in  
42 this survey.  
43  
44  
45  
46  
47  
48

49 Consistent the CDC survey,<sup>13</sup> this survey suggests that many hospital ASPs in Ontario have established a  
50 foundation for their ASP but additional senior leadership sponsorship including increased support for  
51 program impact measurement will be required to advance stewardship programs to the next level. In  
52 this survey, the impact of stewardship program elements on antimicrobial utilization or other outcomes  
53 could not be determined. Further work is underway to explore the relationship between specific  
54 structural and strategic elements on drug utilization in a subset of Ontario hospitals that chose to  
55 participate in this follow-up study.  
56  
57  
58  
59  
60

1  
2  
3  
4  
5  
6  
7  
8  
9  
10  
11  
12  
13  
14  
15  
16  
17  
18  
19  
20  
21  
22  
23  
24  
25  
26  
27  
28  
29  
30  
31  
32  
33  
34  
35  
36  
37  
38  
39  
40  
41  
42  
43  
44  
45  
46  
47  
48  
49  
50  
51  
52  
53  
54  
55  
56  
57  
58  
59  
60

In conclusion, while the majority of Ontario hospitals have a formal ASP, there remain significant opportunities for improvement. Future efforts should focus on ways to optimize resource allocation so that programs can continue to grow in scope.

Confidential



## References

- 1  
2  
3  
4  
5  
6  
7  
8  
9  
10  
11  
12  
13  
14  
15  
16  
17  
18  
19  
20  
21  
22  
23  
24  
25  
26  
27  
28  
29  
30  
31  
32  
33  
34  
35  
36  
37  
38  
39  
40  
41  
42  
43  
44  
45  
46  
47  
48  
49  
50  
51  
52  
53  
54  
55  
56  
57  
58  
59  
60  
1. Centres for Disease Control and Prevention (CDC). Core Elements of Hospital Antibiotic Stewardship Programs [Internet]. Atlanta, GA: CDC; 2017 [cited 2016 Dec 16]. Available from: <https://www.cdc.gov/getsmart/healthcare/implementation/core-elements.html>
2. World Health Organization. Global action plan on antimicrobial resistance. Geneva: World Health Organization; 2015. Available from: [http://apps.who.int/iris/bitstream/10665/193736/1/9789241509763\\_eng.pdf?ua=1](http://apps.who.int/iris/bitstream/10665/193736/1/9789241509763_eng.pdf?ua=1)
3. Ontario Agency for Health Protection and Promotion (Public Health Ontario). Antimicrobial resistance. A public health threat [Internet]. Toronto, ON: Queen's Printer for Ontario; 2016 [cited 2017 Aug 9]. Available from: [https://www.publichealthontario.ca/en/eRepository/OHP\\_infog\\_AntimicrobialResistance\\_2016.pdf](https://www.publichealthontario.ca/en/eRepository/OHP_infog_AntimicrobialResistance_2016.pdf)
4. Society for Healthcare Epidemiology of America, Infectious Diseases Society of America, Pediatric Infectious Diseases Society. Policy statement on antimicrobial stewardship by the Society for Healthcare Epidemiology of America (SHEA), the Infectious Diseases Society of America (IDSA), and the Pediatric Infectious Diseases Society (PIDS). *Infect Control Hosp Epidemiol*. 2012;33(4):322-7.
5. Accreditation Canada. Required organizational practices: handbook 2016. Version 2 [Internet]. Ottawa, ON: Accreditation Canada; 2015 [cited 2017 Feb 21]. Available from: <https://accreditation.ca/sites/default/files/rop-handbook-2016v2.pdf>
6. Institute for Safe Medication Practices (ISMP) Canada. Ontario Antimicrobial Stewardship Survey Summary. Toronto ON: ISMP Canada; 2007. Available from: [https://www.ismp-canada.org/abx/downloads/Ont\\_Abx\\_Stewardship\\_Survey\\_Summary.pdf](https://www.ismp-canada.org/abx/downloads/Ont_Abx_Stewardship_Survey_Summary.pdf)
7. Johanson C, Raybardhan S, Hogg A, Cook J, Ma J, Zvonar R, et al. Advancing a provincial program for antimicrobial stewardship in Ontario [conference abstract]. Poster presented at IPAC Canada; 2015 June 14-17; Victoria, BC.
8. Reddy P, Nisbet C, Van Horne L, Kutty S, Sequeira K, Lemieux C, et al. Early development of a provincial antimicrobial stewardship support model: a needs assessment survey of Ontario hospitals [conference abstract]. Poster presented at ID Week; 2013 Oct 2-6; San Francisco, CA.
9. Canadian Institute for Health Information. Hospital Report Acute Care 2007. Ottawa, ON: Canadian Institute for Health Information, the Government of Ontario, the Ontario Hospital Association and the Hospital Report Research Collaborative; 2007. Available from: [https://secure.cihi.ca/free\\_products/OHA\\_Acute07\\_EN\\_final\\_secure.pdf](https://secure.cihi.ca/free_products/OHA_Acute07_EN_final_secure.pdf)
10. Eysenbach G. Improving the quality of Web surveys: the Checklist for Reporting Results of Internet E-Surveys (CHERRIES). *J Med Internet Res*. 2004;6(3):e34.

- 1  
2  
3 11. Ontario Agency for Health Protection and Promotion (Public Health Ontario). Health Services Locator  
4 Map-PHO Regional IPAC Office Boundaries [Internet]. Toronto, ON: Queen's Printer for Ontario; 2017  
5 [cited 2016 Dec 16]. Available from:  
6 <http://www.publichealthontario.ca/en/DataAndAnalytics/Maps/Pages/Health-Services-Locator.aspx>  
7  
8
- 9 12. Barlam TF, Cosgrove SE, Abbo LM, MacDougall C, Schuetz AN, Septimus EJ, et al. Implementing an  
10 antibiotic stewardship program: guidelines by the infectious diseases society of America and the society  
11 for healthcare epidemiology of America. Clin Infect Dis. 2016;62(10):e51-77.  
12
- 13 13. Pollack LA, van Santen KL, Weiner LM, Dudeck MA, Edwards JR, Srinivasan A. Antibiotic stewardship  
14 programs in U.S. acute care hospitals: findings from the 2014 national healthcare safety network annual  
15 hospital survey. Clin Infect Dis. 2016;63(4):443-9.  
16
- 17 14. Antimicrobial Stewardship and Resistance Committee. Association of Medical Microbiology and  
18 Infectious Disease (AMMI) Canada. Business case for inpatient antimicrobial stewardship programs in  
19 acute care, cancer care, rehabilitation and complex continuing care [Internet]. Ottawa, ON: AMMI  
20 Canada; 2016 [cited 2017 Jan 10]. Available from: <https://www.ammi.ca/?ID=126>  
21  
22
- 23 15. Ibrahim OM, Polk RE. Antimicrobial use metrics and benchmarking to improve stewardship  
24 outcomes: methodology, opportunities, and challenges. Infect Dis Clin North Am. 2014;28(2):195-214.  
25  
26
- 27 16. Septimus E. Antimicrobial stewardship-qualitative and quantitative outcomes: the role of  
28 measurement. Curr Infect Dis Rep. 2014;16(11):433,014-0433-x.  
29  
30
- 31 17. Draugalis JR, Coons SJ, Plaza CM. Best practices for survey research reports: a synopsis for authors  
32 and reviewers. Am J Pharm Educ. 2008;72(1):11.  
33  
34  
35  
36  
37  
38  
39  
40  
41  
42  
43  
44  
45  
46  
47  
48  
49  
50  
51  
52  
53  
54  
55  
56  
57  
58  
59  
60

Table 1. Characteristics of responding organizations

| Characteristic                          | No. (%) of Responses (n=97) | Total No. (%) in Ontario* (N=131) |
|-----------------------------------------|-----------------------------|-----------------------------------|
| <b>Hospital Type</b>                    |                             |                                   |
| Acute Teaching                          | 15 (15)                     | 16 (12)                           |
| Large Community                         | 44 (45)                     | 57 (44)                           |
| Small Community                         | 27 (28)                     | 44 (34)                           |
| CCC & Rehab                             | 11 (11)                     | 14 (11)                           |
| <b>Region**</b>                         |                             |                                   |
| North                                   | 22 (23)                     | 36 (27)                           |
| West                                    | 11 (11)                     | 19 (15)                           |
| Central-West                            | 14 (14)                     | 18 (14)                           |
| Central                                 | 31 (32)                     | 34 (26)                           |
| East                                    | 19 (20)                     | 24 (18)                           |
| <b>Organizations with &gt;1 site***</b> | 38 (39)                     | -                                 |
| <b>Number of In-Patient Beds***</b>     |                             |                                   |
| >200                                    | 46 (47)                     | -                                 |
| 100-200                                 | 12 (12)                     | -                                 |
| 51-99                                   | 19 (20)                     | -                                 |
| <50                                     | 20 (21)                     | -                                 |

\*refers to hospital organizations excluding mental health and ambulatory

\*\*defined according to PHO Regional Infection Prevention and Control (IPAC) office boundaries<sup>11</sup>

\*\*\* this information was self-reported

Table 2: Presence formal antimicrobial stewardship programs by hospital type

| Hospital Type          | No. (%) with formal ASP | No. (%) in process of implementing a formal ASP |
|------------------------|-------------------------|-------------------------------------------------|
| Acute Teaching (n=15)  | 14 (93)                 | -                                               |
| Large Community (n=44) | 41 (93)                 | -                                               |
| Small Community (n=27) | 21 (78)                 | 4                                               |
| CCC & Rehab (n=11)     | 9 (82)                  | 1                                               |
| Total (N=97)           | 85 (88)                 | 5 (5)                                           |

**Table 3. Resource allocation for acute teaching and large community hospital ASPs reporting designated resources**

| Hospital Type (n)*     | No. (%) with Designated Resources for ASP | No. (%) with Resources allocated for ASP Physician and/or Pharmacist FTE | Average Physician FTE** | Average Pharmacist FTE** |
|------------------------|-------------------------------------------|--------------------------------------------------------------------------|-------------------------|--------------------------|
| Acute Teaching (n=14)  | 12 (86)                                   | 12 (86)                                                                  | 0.57/1000 beds          | 2.16/1000 beds           |
| Large Community (n=41) | 28 (68)                                   | 26 (63)                                                                  | 0.65/1000 beds          | 2.55/1000 beds           |

\*n = number of responding organizations with formal ASP

\*\*average full-time equivalent (FTE) calculation includes all hospitals reporting designated resources

**Table 4. Frequency of Antimicrobial Stewardship Strategy Implementation**

|                                                                                                   | % of Respondents      |                        |                        |                    |                |
|---------------------------------------------------------------------------------------------------|-----------------------|------------------------|------------------------|--------------------|----------------|
|                                                                                                   | Acute Teaching (n=15) | Large Community (n=44) | Small Community (n=27) | CCC & Rehab (n=11) | Overall (n=97) |
| <b>Prescribing Guidance Strategies</b>                                                            |                       |                        |                        |                    |                |
| Intravenous to oral conversion                                                                    | 73                    | 82                     | 63                     | 45                 | 71             |
| Disease-specific treatment guidelines/pathways/algorithms and/or associated order forms           | 67                    | 82                     | 56                     | 73                 | 71             |
| Empiric antibiotic prescribing guidelines                                                         | 80                    | 66                     | 48                     | 64                 | 63             |
| Prescriber education                                                                              | 87                    | 68                     | 33                     | 45                 | 59             |
| Facilitation of appropriate and timely antimicrobial administration in severe sepsis/septic shock | 47                    | 55                     | 33                     | 9                  | 42             |
| Clinical decision support systems/computerized physician order entry                              | 33                    | 9                      | 7                      | 9                  | 12             |
| <b>Clinical Strategies</b>                                                                        |                       |                        |                        |                    |                |
| Therapeutic drug monitoring (with feedback)                                                       | 80                    | 89                     | 85                     | 82                 | 86             |
| Dose optimization                                                                                 | 80                    | 84                     | 63                     | 55                 | 74             |
| De-escalation and streamlining                                                                    | 73                    | 70                     | 59                     | 45                 | 65             |
| Prospective audit with intervention and feedback                                                  | 80                    | 82                     | 33                     | 55                 | 65             |
| Targeted review of redundant therapy or therapeutic duplication                                   | 33                    | 70                     | 67                     | 36                 | 60             |
| Identification of inappropriate pathogen/antimicrobial combinations ("bug-drug mismatch")         | 47                    | 68                     | 52                     | 64                 | 60             |

|                                                                         |    |    |    |    |    |
|-------------------------------------------------------------------------|----|----|----|----|----|
| Targeted review of patients with <i>Clostridium difficile</i> infection | 33 | 77 | 41 | 55 | 58 |
| Preventing treatment of non-infectious conditions                       | 40 | 59 | 26 | 27 | 43 |
| Targeted review of patients with bacteremia/fungemia                    | 47 | 55 | 26 | 18 | 41 |
| Scheduled antimicrobial reassessments ("antibiotic time-outs")          | 27 | 36 | 26 | 18 | 30 |
| <b>Microbiology Related Strategies</b>                                  |    |    |    |    |    |
| Antibiograms                                                            | 93 | 93 | 70 | 45 | 81 |
| Cascading microbiology susceptibility reporting                         | 80 | 80 | 15 | 18 | 55 |
| Strategic microbiology results reporting                                | 80 | 70 | 26 | 27 | 55 |
| Promotion of timely and appropriate microbiologic sampling              | 67 | 61 | 44 | 18 | 53 |
| Improved diagnostics                                                    | 80 | 57 | 30 | 18 | 49 |
| <b>Structural/Process Related Strategies</b>                            |    |    |    |    |    |
| Automatic stop orders                                                   | 53 | 89 | 89 | 64 | 80 |
| Drug use evaluation/medication use evaluation                           | 60 | 52 | 41 | 64 | 52 |
| Surgical antibiotic prophylaxis optimization                            | 87 | 61 | 19 | 9  | 47 |
| General antimicrobial order forms                                       | 7  | 32 | 30 | 36 | 28 |
| Systematic antibiotic allergy verification                              | 7  | 34 | 11 | 55 | 26 |
| Improved antimicrobial documentation                                    | 13 | 23 | 22 | 36 | 23 |
| Checklists                                                              | 27 | 11 | 4  | 36 | 14 |
| <b>Formulary Related Strategies</b>                                     |    |    |    |    |    |
| Formulary review/streamlining                                           | 67 | 80 | 85 | 45 | 75 |
| Formulary automatic substitution/therapeutic interchange policies       | 67 | 84 | 67 | 36 | 71 |
| Formulary restriction                                                   | 73 | 59 | 41 | 36 | 54 |
| Formulary restriction with preauthorization                             | 40 | 34 | 15 | 27 | 29 |

1  
2  
3  
4  
5  
6  
7  
8  
9  
10  
11  
12  
13  
14  
15  
16  
17  
18  
19  
20  
21  
22  
23  
24  
25  
26  
27  
28  
29  
30  
31  
32  
33  
34  
35  
36  
37  
38  
39  
40  
41  
42  
43  
44  
45  
46  
47  
48  
49  
50  
51  
52  
53  
54  
55  
56  
57  
58  
59  
60

**Figure 1. Comparison of selected antimicrobial stewardship strategies. Percentage of strategies implemented as of 2013 and 2016. Organizations that responded “not known” to year of implementation were excluded from this analysis.**

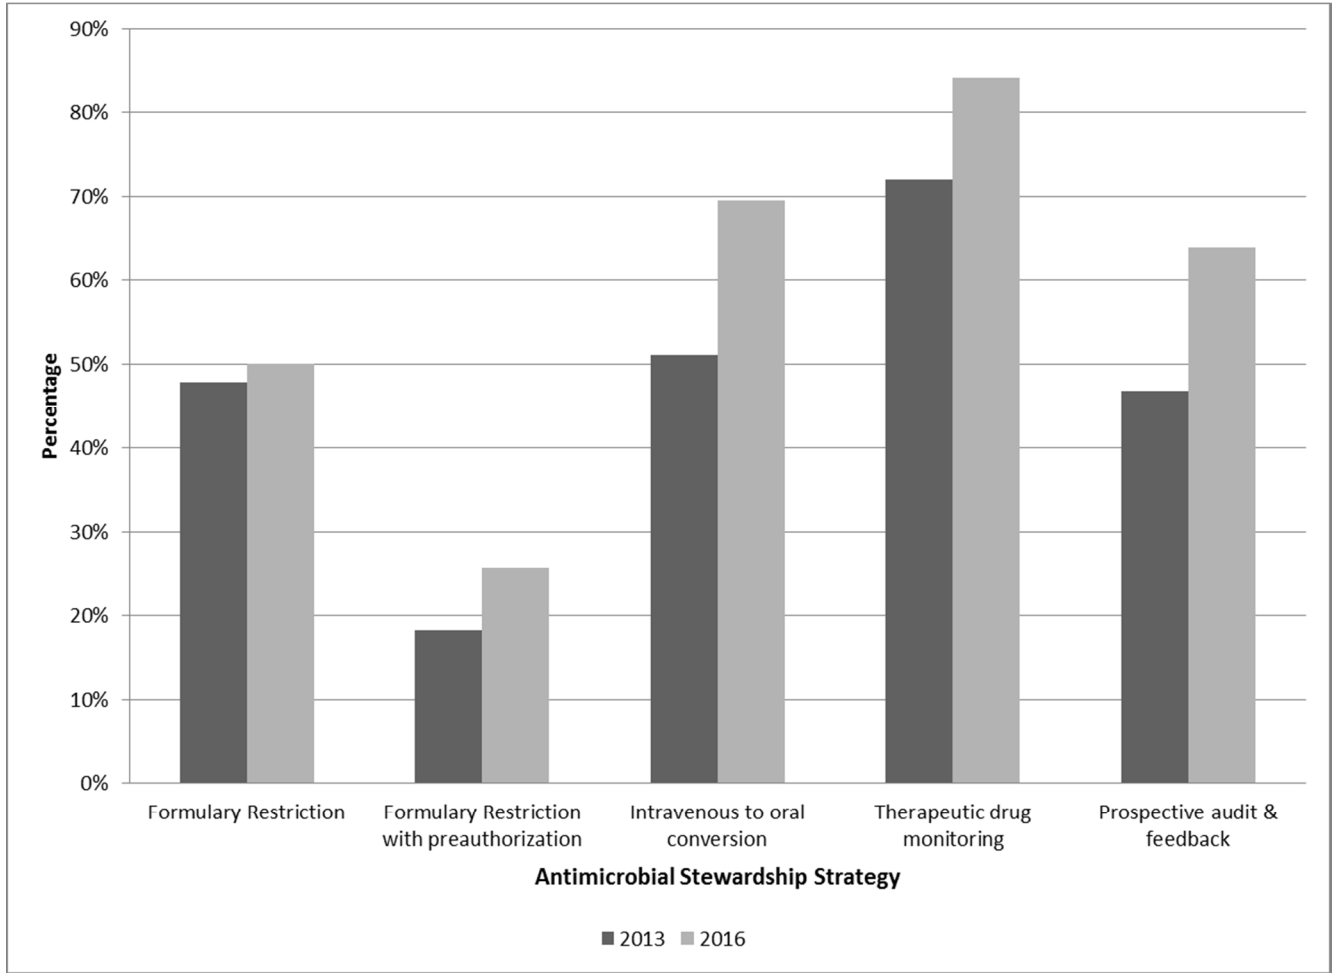

Supplement: supp_6.1.E71_2017-0111_original_submission.pdf [file supp_6.1.E71_2017-0111_original_submission.pdf]
